# Supplementary material
Source: Springer Nature journal article supplement (https://www.springermedizin.de/resource/supplementary/12958_2010_757_MOESM3_ESM.pdf/9568412)

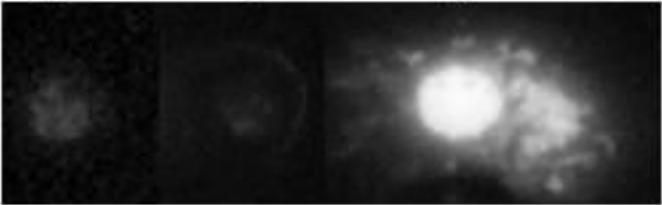

a

b

c

Supplement: MOESM3 [file 9568412]
